# Supplementary material
Source: MDPI journal article supplement (https://www.mdpi.com/2073-4433/14/6/995)
Supplement: s1 [file s1 › atmosphere-2398906-supplementary.pdf]

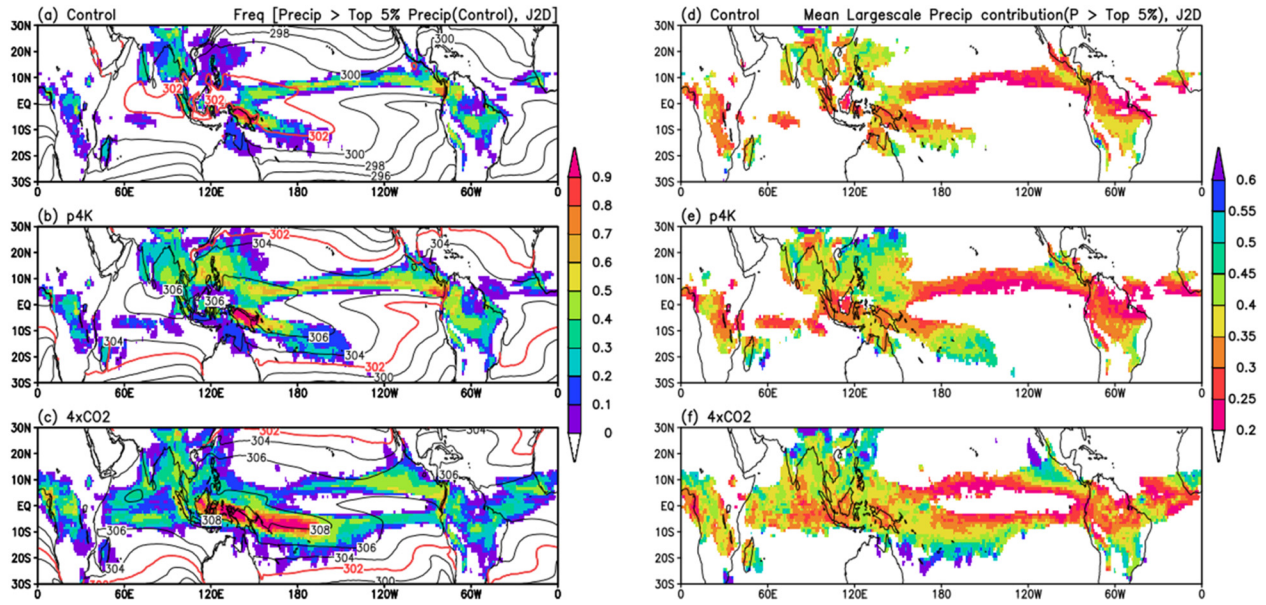

**Figure S1.** Spatial distribution of SST and Frequency of Occurrence (FOC) for top 5% precipitation (PCT05) in fractional units, based on monthly rainfall data from January through December (J2D) for a) control, b) P4K and c) 4xCO<sub>2</sub>, with warm pool SST (302K) outlined in red. Corresponding distributions for stratiform (large-scale) rain in fractional units are shown in d), e) and f) respectively.

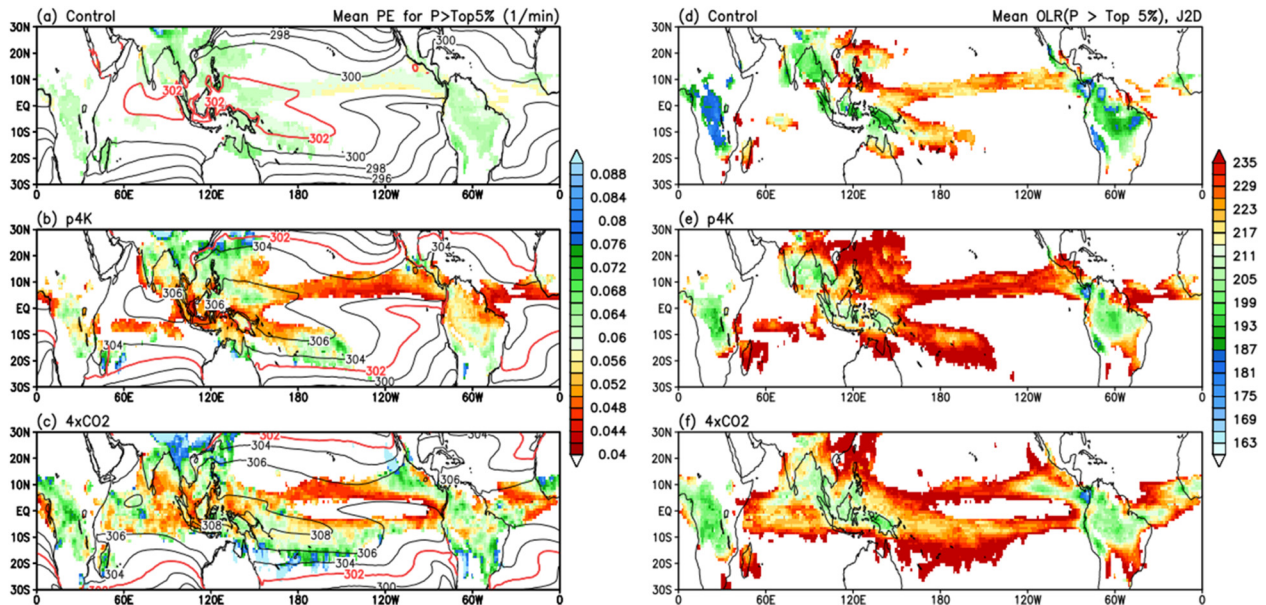

**Figure S2.** Spatial distribution of SST and precipitation efficiency (PE) for top 5% precipitation (PCT05) in unit of minute<sup>-1</sup>, based on monthly rainfall data from January through December (J2D) for a) control, b) P4K and c) 4xCO<sub>2</sub>, with respective warm pool SST outlined in red. Corresponding distributions for outgoing longwave radiation (OLR) in units of (Watt m<sup>-2</sup>) are shown in d), e) and f) respectively.

**Table S1.** Extreme tropical monthly precipitation intensity threshold (mm/day) as a function of top-percentile rain rate for ocean-only, land-only and ocean+land, under Control, P4K and 4xCO<sub>2</sub> respectively. Numbers in bracket in first column represent total number of grid-points for the entire tropics (30°S-30°N).

---

|                   |         | 5%    | 1%    | 0.5%  | 0.25% | 0.1%  | 0.05% | 0.01% |
|-------------------|---------|-------|-------|-------|-------|-------|-------|-------|
| Ocean<br>(192984) | Control | 9.61  | 12.41 | 13.64 | 15.53 | 19.16 | 21.44 | 26.12 |
|                   | P4K     | 11.65 | 15.80 | 17.67 | 19.38 | 21.81 | 23.62 | 27.92 |
|                   | 4xCO2   | 13.53 | 18.42 | 20.40 | 22.35 | 24.92 | 26.82 | 31.24 |
| Land<br>(66216)   | Control | 12.60 | 18.13 | 21.37 | 24.16 | 28.16 | 30.88 | 43.16 |
|                   | P4K     | 14.89 | 19.73 | 22.31 | 25.06 | 28.20 | 30.04 | 42.48 |
|                   | 4xCO2   | 17.19 | 23.07 | 25.64 | 29.14 | 33.65 | 37.97 | 51.95 |
| Ocean+            | Control | 10.04 | 13.34 | 15.25 | 18.20 | 22.32 | 25.06 | 31.64 |
| Land<br>(259200)  | P4K     | 11.61 | 15.89 | 17.92 | 19.76 | 22.93 | 25.64 | 30.54 |
|                   | 4xCO2   | 12.95 | 18.37 | 20.77 | 23.32 | 26.89 | 30.72 | 39.48 |
